# Supplementary material
Source: publisher site journal article supplement (https://www.dovepress.com/article/209312)
Supplement: Supplementary file 1 [file get_supplementary_file.php]

**
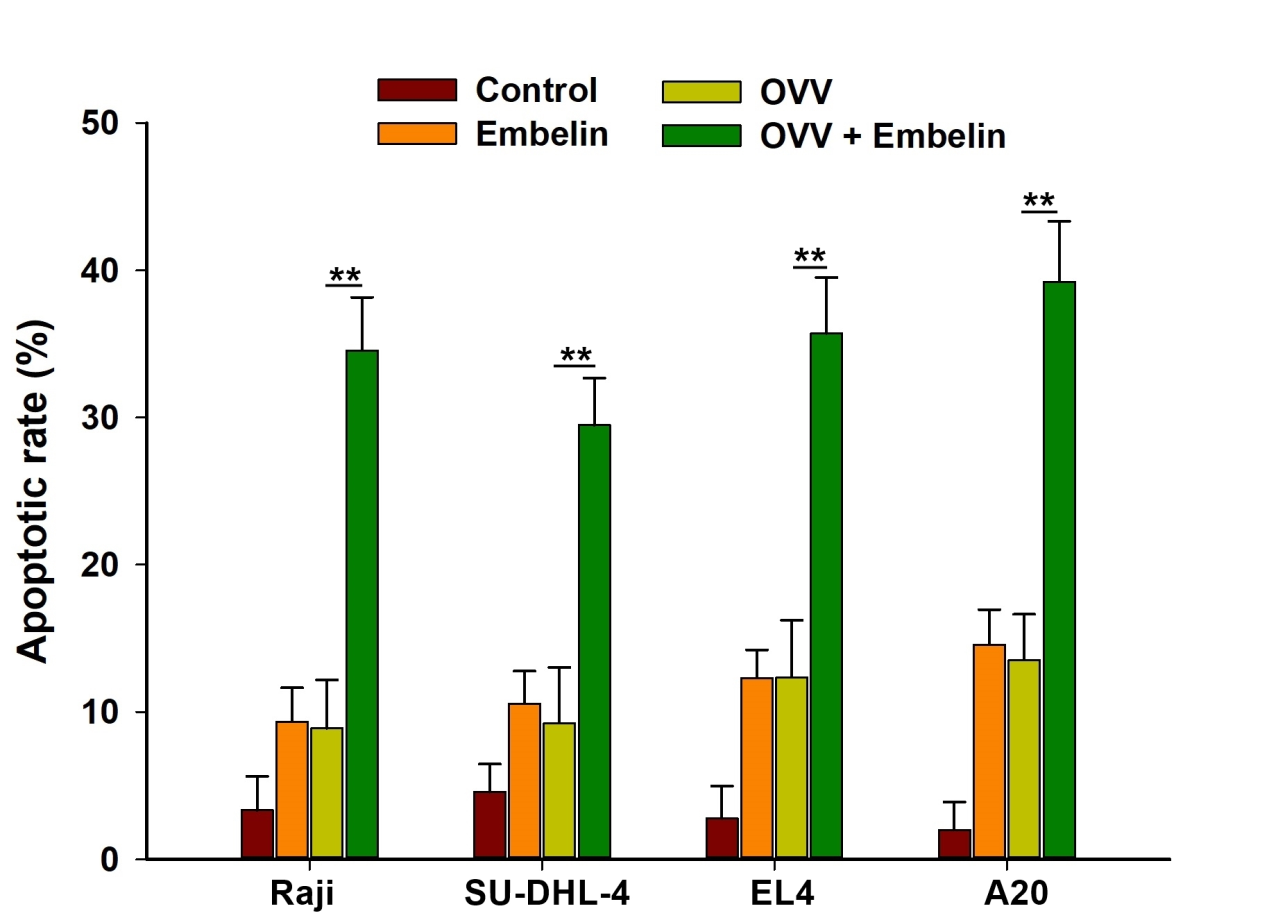
**

**Figure S1. Embelin enhanced OVV-induced apoptosis in lymphoma cells in vitro.** Apoptosis was analyzed via Annexin V-APC/7-AAD double staining. Raji, SU-DHL-4, EL4 and A20 cells were infected with embelin (10 μM), OVV (5 MOI) or embelin plus OVV. Florescence was then analyzed by flow cytometry. Data are presented as mean ± SD of three separate experiments. **p < 0.01

**
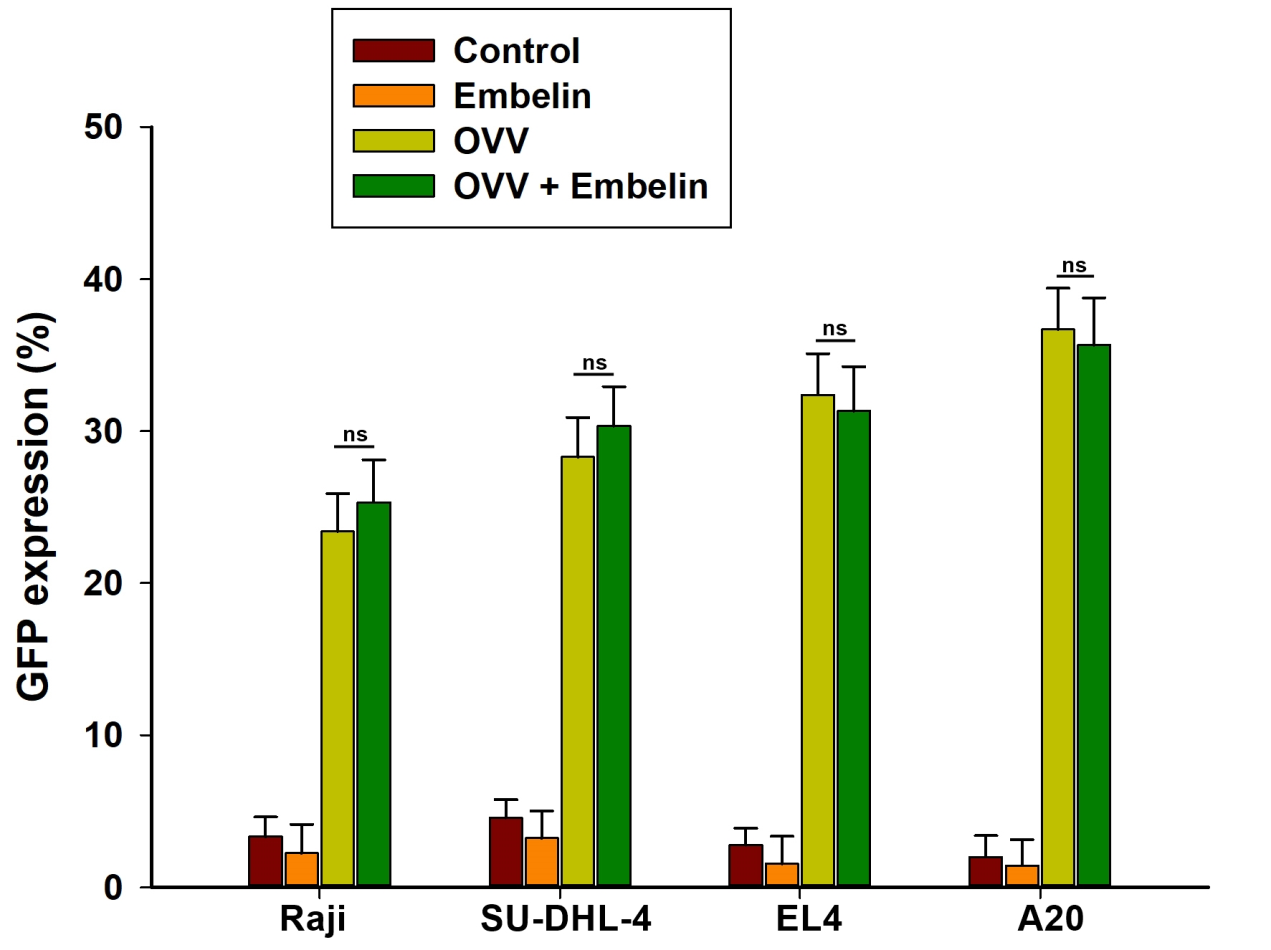
**

**Figure S2. The infection efficiency of lymphoma cells with OVV was not affected by embelin.** Raji, SU-DHL-4, EL4 and A20 cells were infected with GFP-armed OVV (1 MOI) for 24 hours. Florescence was then analyzed by flow cytometry. Data are presented as mean ± SD of three separate experiments. ns means not significant.

**
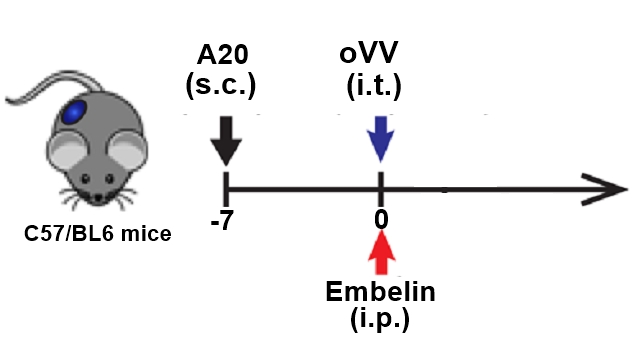
**

**Figure S3. Schematic of experimental timeline.** C57/BL6 mice implanted with A20 tumor xenografts were injected with PBS, OVV, embelin.
